# Supplementary material for: Fat mass and obesity-associated (FTO) rs9939609 polymorphism modifies the relationship between body mass index and affective symptoms through the life course: a prospective birth cohort study
Source: PubMed Central journal article supplement (PMC5847566; doi:10.1038/s41398-018-0110-1), 2018-03-13

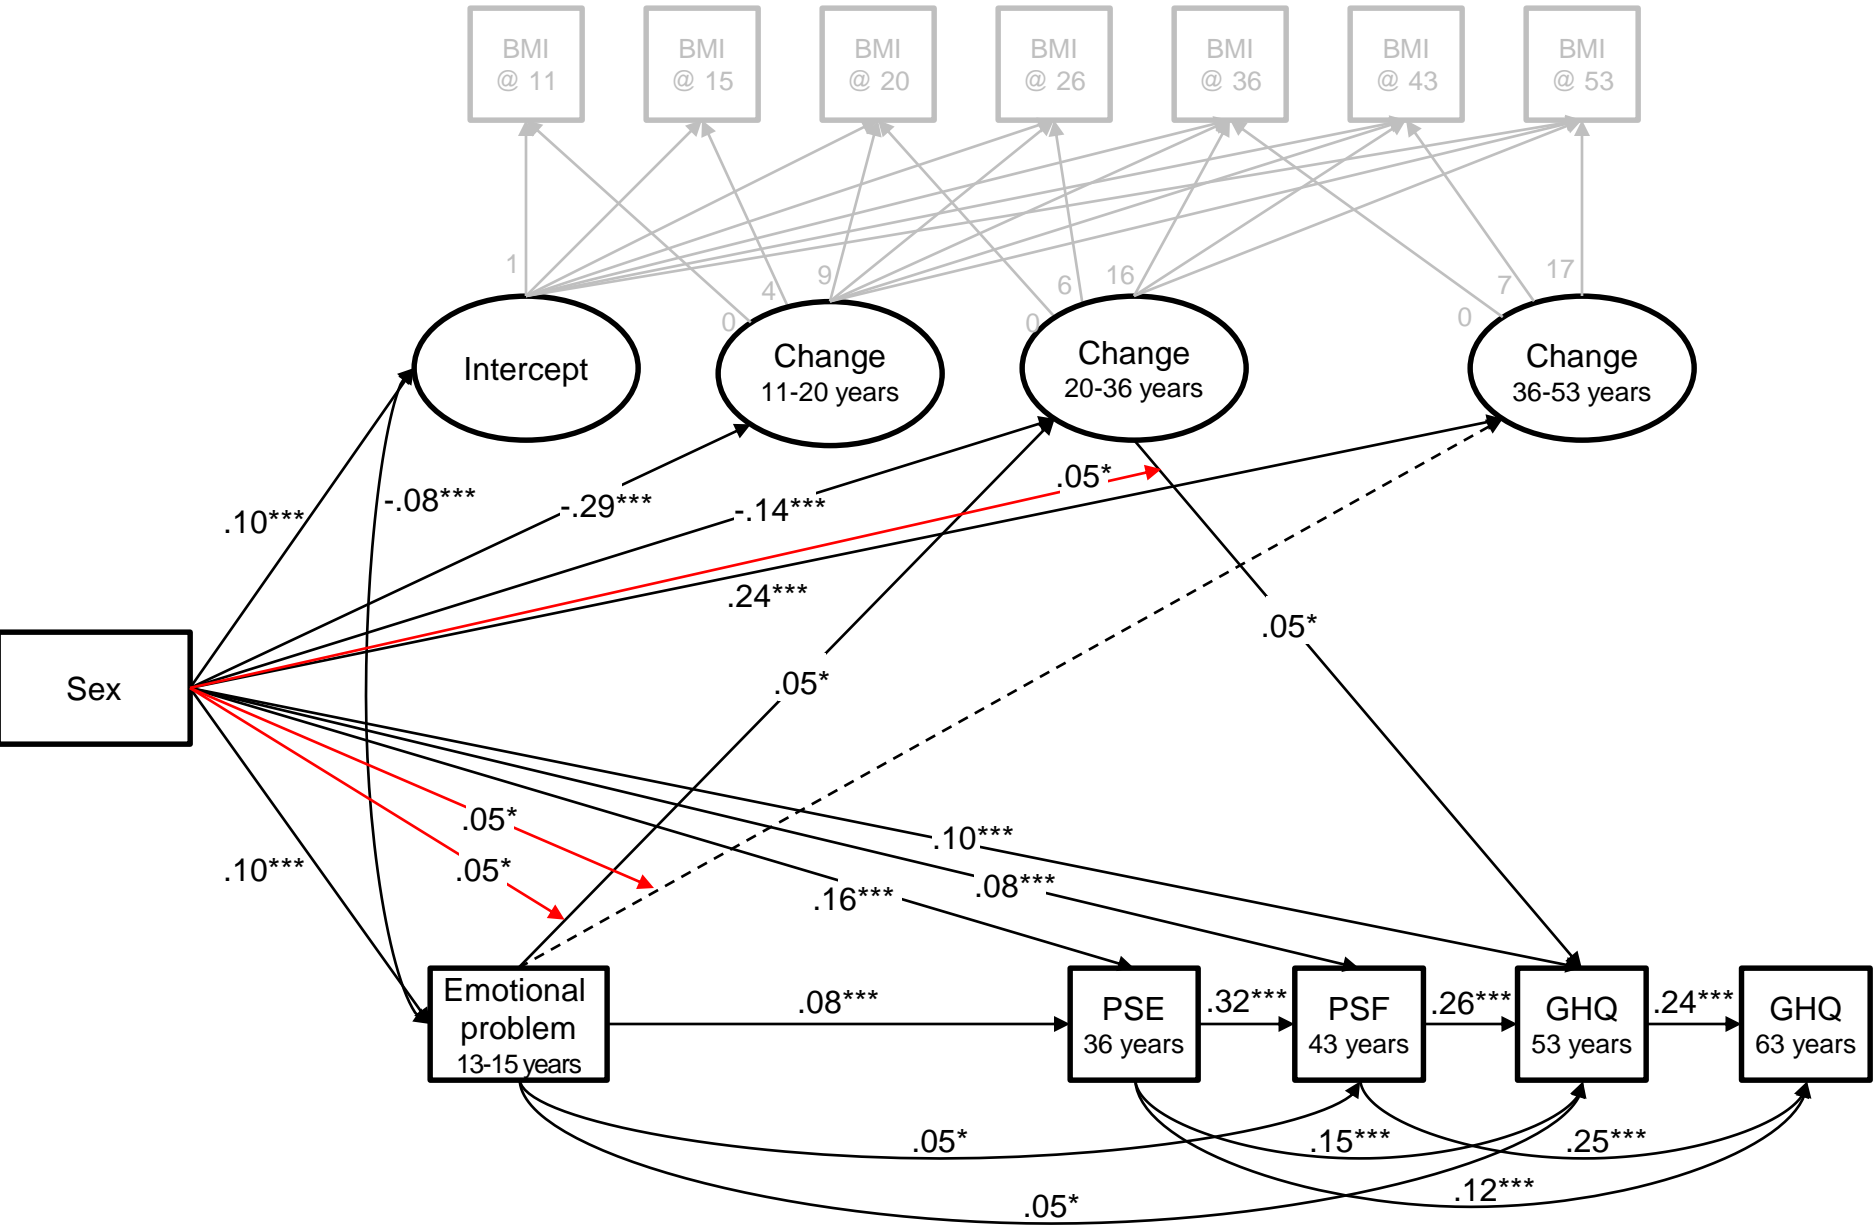

Supplement: 41398_2018_110_MOESM2_ESM.pdf [file 41398_2018_110_MOESM2_ESM.pdf]
